# Supplementary material
Source: PubMed Central journal article supplement (PMC3191248)
Supplement: NIHMS322437-supplement-2.pdf [file NIHMS322437-supplement-2.pdf]

Representative experiment that was repeated with  $n = 3$  mice as a source of cells / group / experiment. Histogram plots are gated on CD11c<sup>+</sup> cells.

**F:** Aged and young BMDCs were stimulated with 3 $\mu$ g/ml of STF2.HA1-2 (black line) of HA1-2 control (grey line) and the upregulation of costimulatory molecules CD80 and CD86 were assessed by flow cytometry.  $N = 3$  mice as a source of cells / group. Histogram plots are gated on CD11c<sup>+</sup> cells.

*Supplemental Figure 1 Direct linkage of STF2 with HA1.2 is required to induce anti-HA IgG.*

Groups of young BALB/c mice were immunized on day 0 and +14 with either: i) PBS; ii) STF2; iii) HA1.2; iv) a mixture of STF2 and HA1.2 (not directly linked); v) directly linked STF2.HA1.2; and vi) HA1.2 + alum. On day +21, serum was harvested and antibodies to HA measured by ELISA as described in materials and methods. Only mice that received STF2.HA1-2 (i.e., the vaccine that has direct linking of STF2 with HA1-2) exhibited detectable levels of anti-HA antibodies in the serum.  $N =$  at least 3-6 mice / group, error bars = SEM
